# Supplementary material for: Structure of the WD40 domain of SCAP from fission yeast reveals the molecular basis for SREBP recognition
Source: PubMed Central journal article supplement — Cell Res. 2015 Mar 13;25(4):401–11. doi: 10.1038/cr.2015.32 (PMC4387560; doi:10.1038/cr.2015.32), 2015-03-13
Supplement: cr201532x1.pdf [file cr201532x1.pdf]

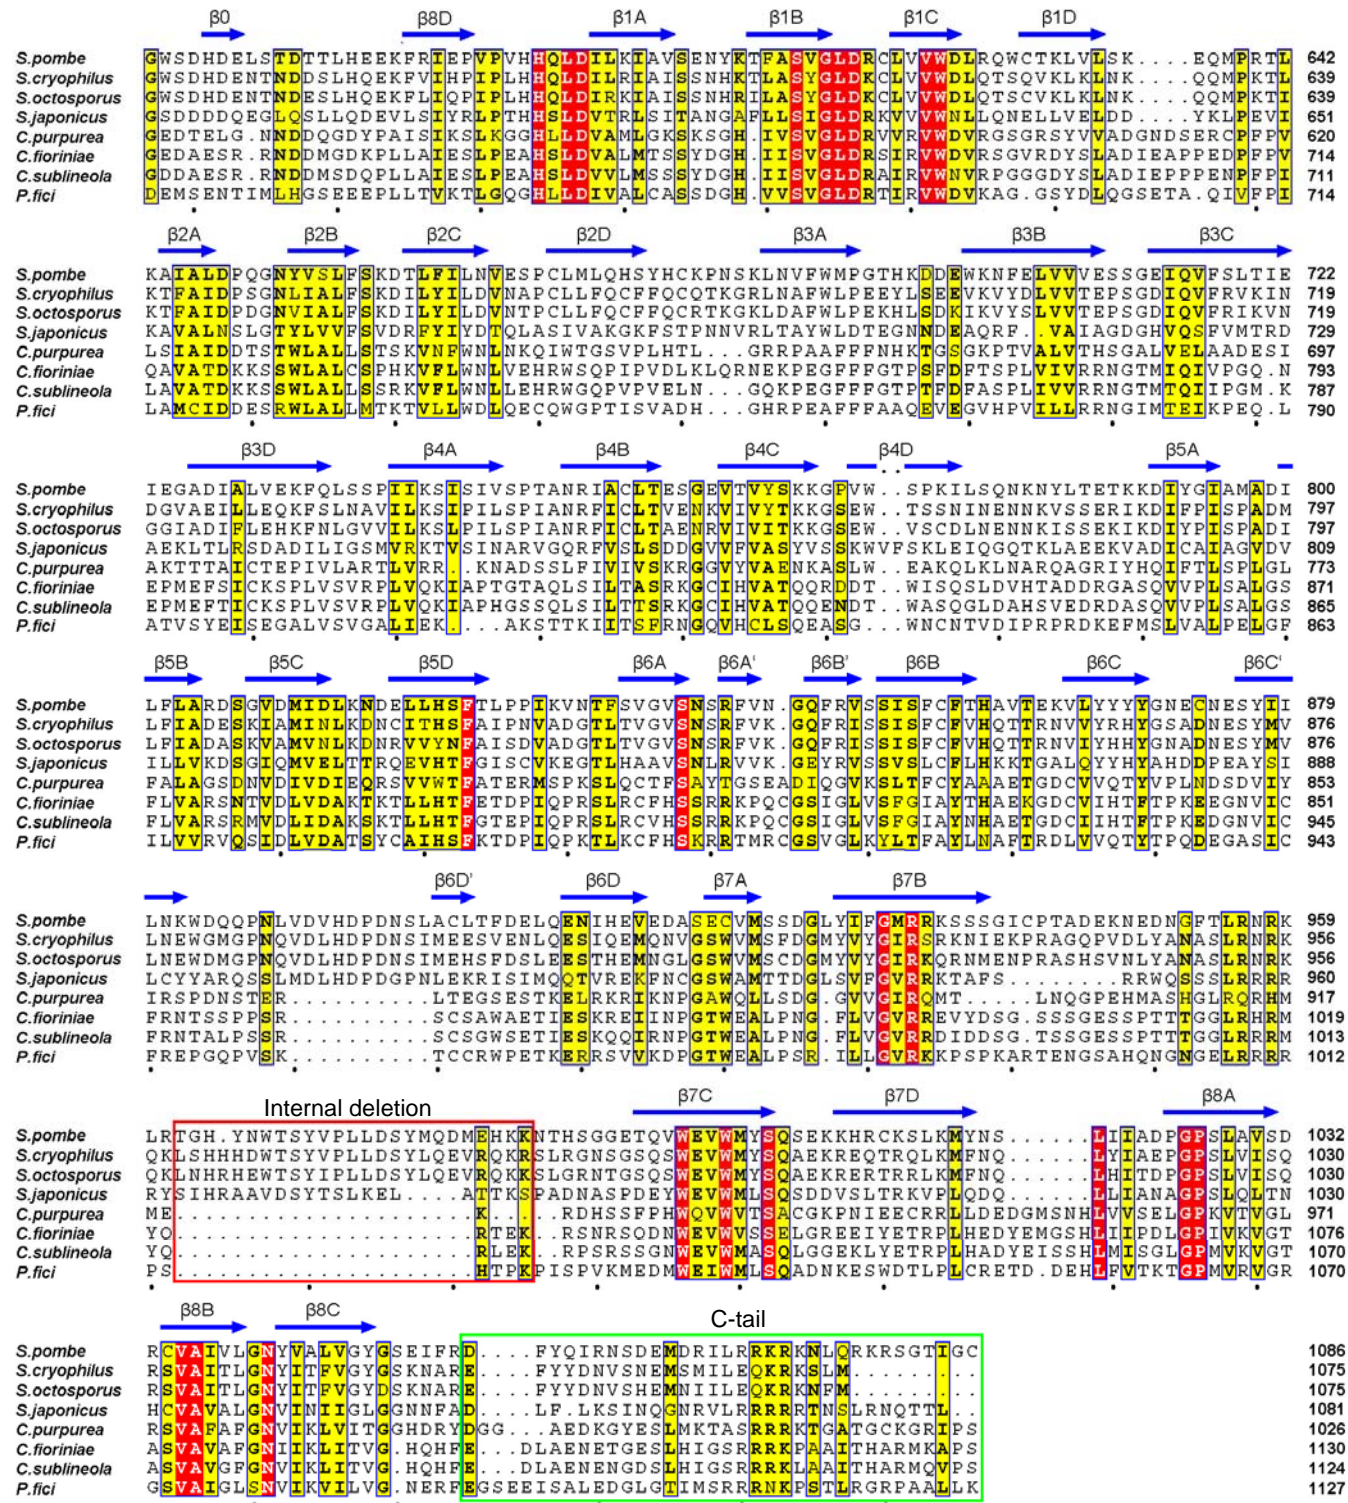

Figure S1

**Supplementary information, Figure S1** Sequence alignment of the Scp1 WD40

domain from eight closely related species.

Invariant and highly conserved amino acids are shaded in red and yellow, respectively.

The secondary structural elements are indicated above the sequences. The  $\beta$  strands of the eight blades are labeled from  $\beta$ 1A- $\beta$ 1D to  $\beta$ 8A- $\beta$ 8D and the  $\beta$  strand of N terminal extension is labeled  $\beta$ 0. The internal deletion (residues 962-985) and the C terminal tail (residues 1055-1086), which were truncated for crystallization, are boxed in red and green, respectively.

The listed Scp1 homologs, from top to bottom, include those from

*Schizosaccharomyces cryophilus*, GI: 528318978; *Schizosaccharomyces*

*octosporus*, GI: 528061682; *Schizosaccharomyces japonicus*, GI: 213408737;

*Claviceps purpurea*, GI: 399169208; *Colletotrichum fioriniae*, GI: 615473429;

*Colletotrichum sublineola*, GI: 640917775; *Pestalotiopsis fici*, GI: 630022336.
