# Supplementary material for: Structure of the WD40 domain of SCAP from fission yeast reveals the molecular basis for SREBP recognition
Source: PubMed Central journal article supplement — Cell Res. 2015 Mar 13;25(4):401–11. doi: 10.1038/cr.2015.32 (PMC4387560; doi:10.1038/cr.2015.32), 2015-03-13
Supplement: cr201532x2.pdf [file cr201532x2.pdf]

A Top View

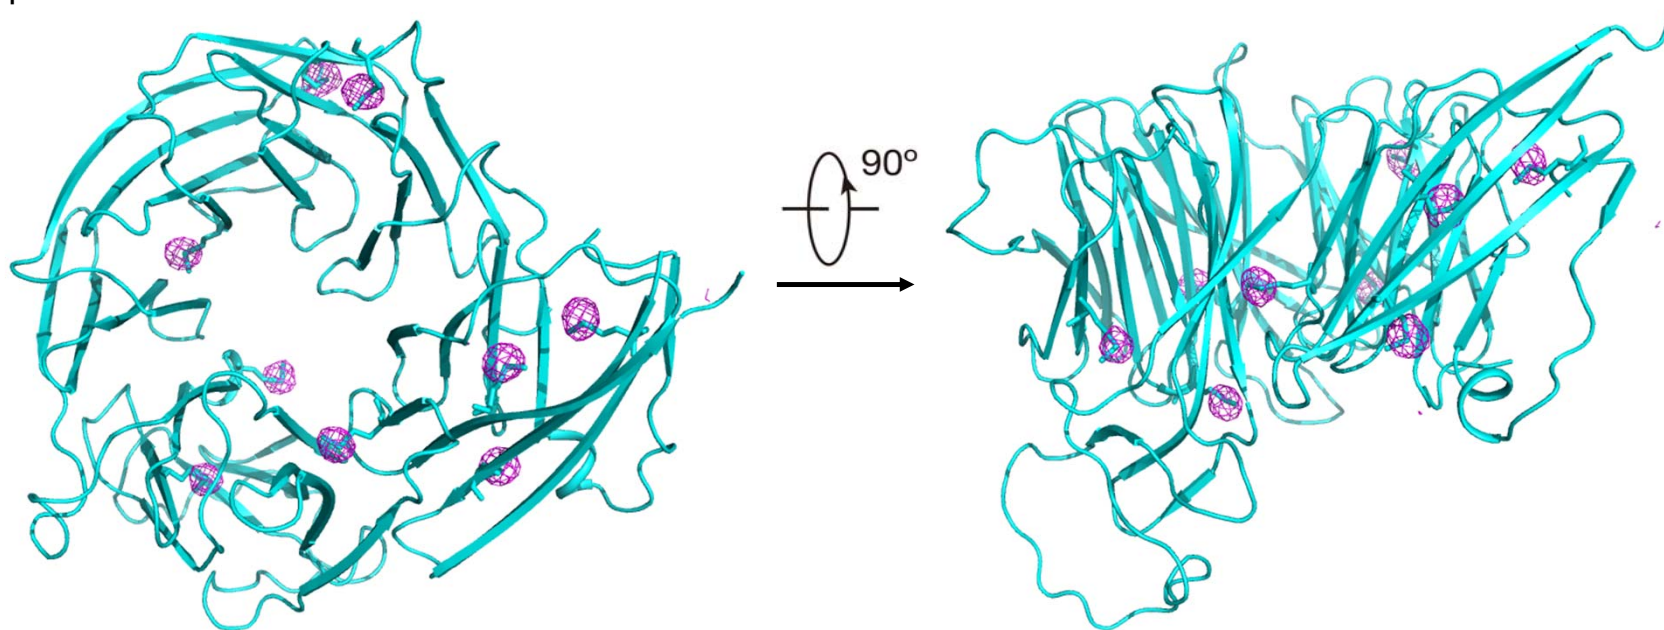

B Top View

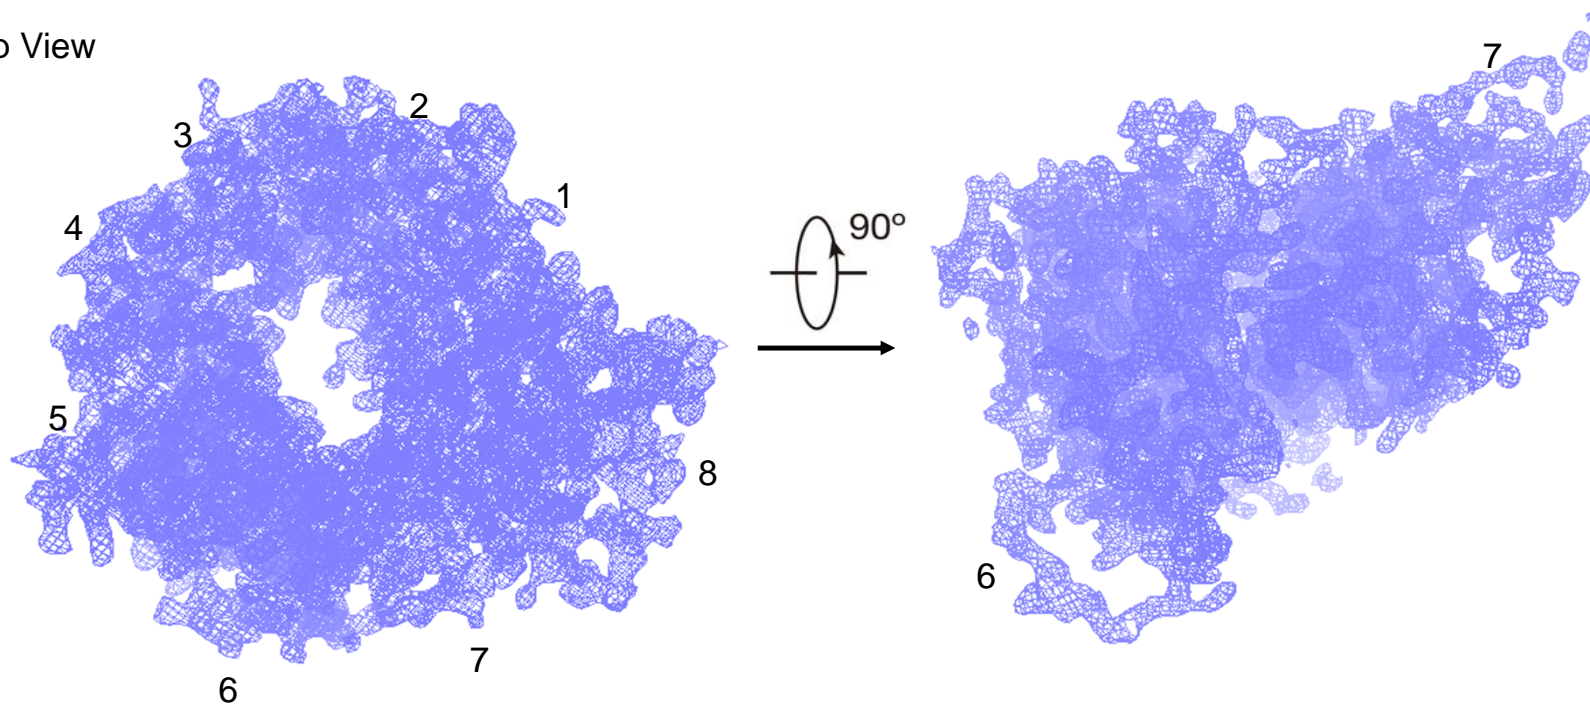

Figure S2

**Supplementary information, Figure S2** Structural determination of the Scp1 WD40 domain.

**(A)** The anomalous signal for selenium (Se). The structure was determined by Se-single anomalous diffraction (Se-SAD). The anomalous signals for Se, shown as magenta mesh, were contoured at  $4.0 \sigma$ . **(B)** Electron density map of Scp1-WD40. The  $2\text{Fo}-\text{Fc}$  electron density map for Scp1-WD40, shown in blue mesh, was contoured at  $1.0 \sigma$ .
