# Supplementary material for: Structure of the WD40 domain of SCAP from fission yeast reveals the molecular basis for SREBP recognition
Source: PubMed Central journal article supplement — Cell Res. 2015 Mar 13;25(4):401–11. doi: 10.1038/cr.2015.32 (PMC4387560; doi:10.1038/cr.2015.32), 2015-03-13
Supplement: cr201532x3.pdf [file cr201532x3.pdf]

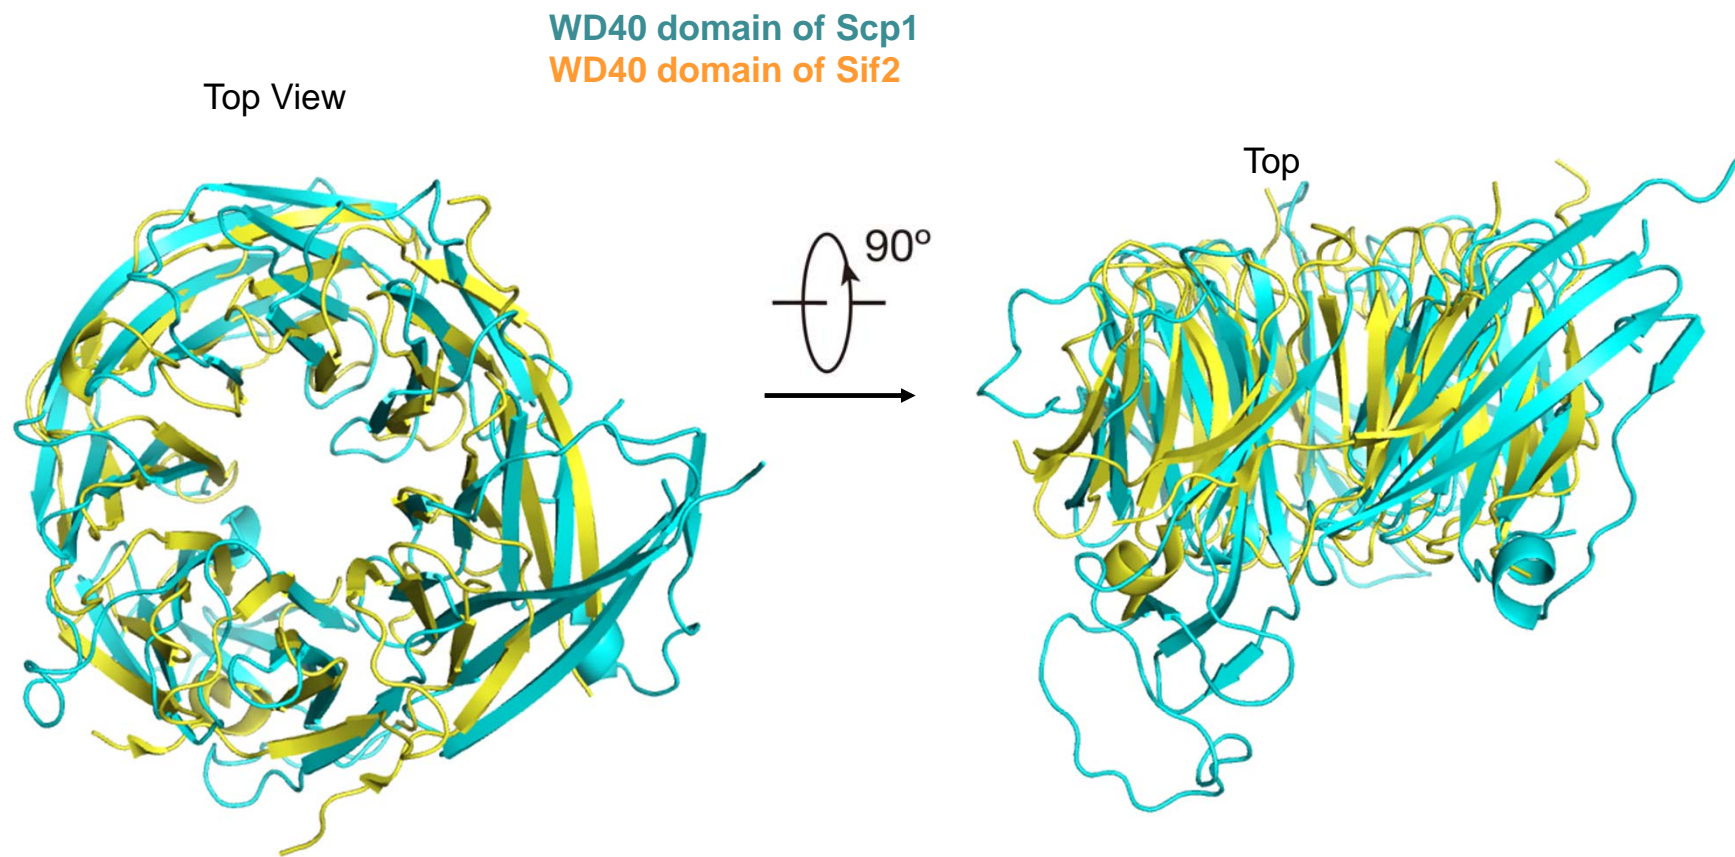

Figure S3

**Supplementary information, Figure S3** Structural comparison of the WD40

domains of Scp1 and Sif2.

Scp1-WD40 and Sif2-WD40 (PDB accession code: 1R5M) are shown in cyan and yellow, respectively. Two perpendicular views are shown. Despite the elongated blades (blades 3/6/7) in Scp1-WD40, the core structures of the two eight-bladed  $\beta$ -propellers are similar.
