# Supplementary material for: Structure of the WD40 domain of SCAP from fission yeast reveals the molecular basis for SREBP recognition
Source: PubMed Central journal article supplement — Cell Res. 2015 Mar 13;25(4):401–11. doi: 10.1038/cr.2015.32 (PMC4387560; doi:10.1038/cr.2015.32), 2015-03-13
Supplement: cr201532x4.pdf [file cr201532x4.pdf]

A

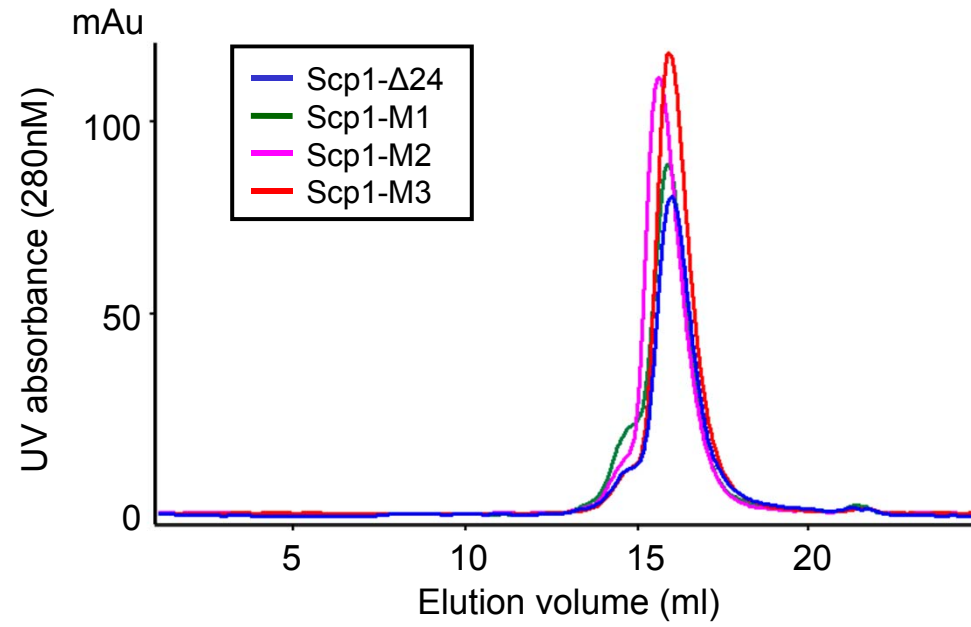

B

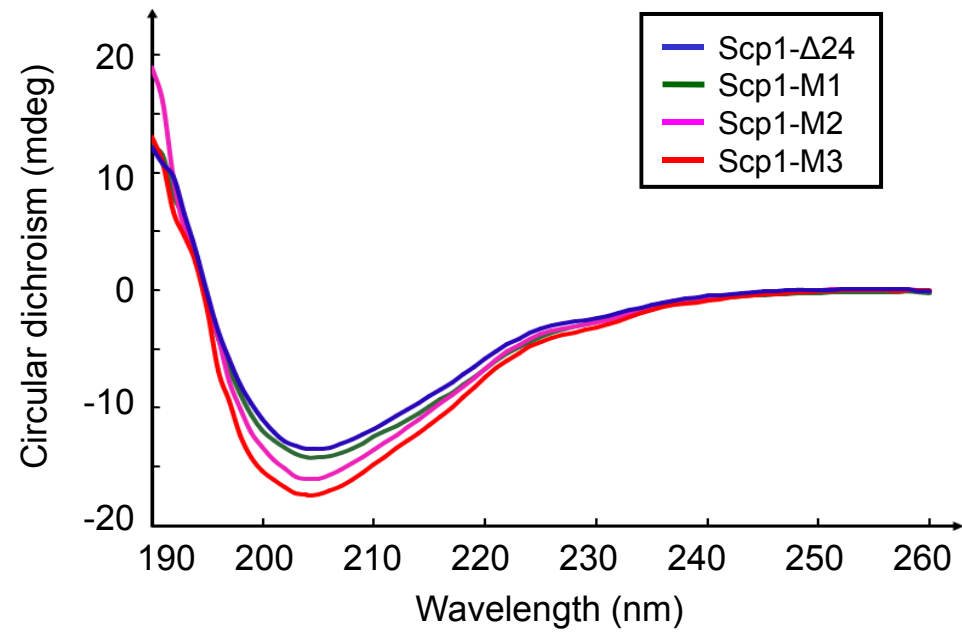

Figure S4

**Supplementary information, Figure S4** The Scp1-WD40 RK patch mutants are well-folded.

**(A)** Size exclusion chromatography (SEC) of purified Scp1-WD40 variants

M1/M2/M3. The SEC profiles are similar between the WT Scp1- $\Delta$ 24 and the RK patch mutants (Scp1-M1: R617E; Scp1-M2: K635E/R640E/K643E; Scp1-M3:

K659E/K685E). **(B)** The secondary structural elements are nearly identical between

the WT and the RK patch mutants of Scp1-WD40. Shown here are circular dichroism

(CD) spectra of the Scp1-WD40 (Scp1- $\Delta$ 24) and the three RK patch mutants.
