# Supplementary material for: Structure of the WD40 domain of SCAP from fission yeast reveals the molecular basis for SREBP recognition
Source: PubMed Central journal article supplement — Cell Res. 2015 Mar 13;25(4):401–11. doi: 10.1038/cr.2015.32 (PMC4387560; doi:10.1038/cr.2015.32), 2015-03-13
Supplement: cr201532x5.pdf [file cr201532x5.pdf]

A

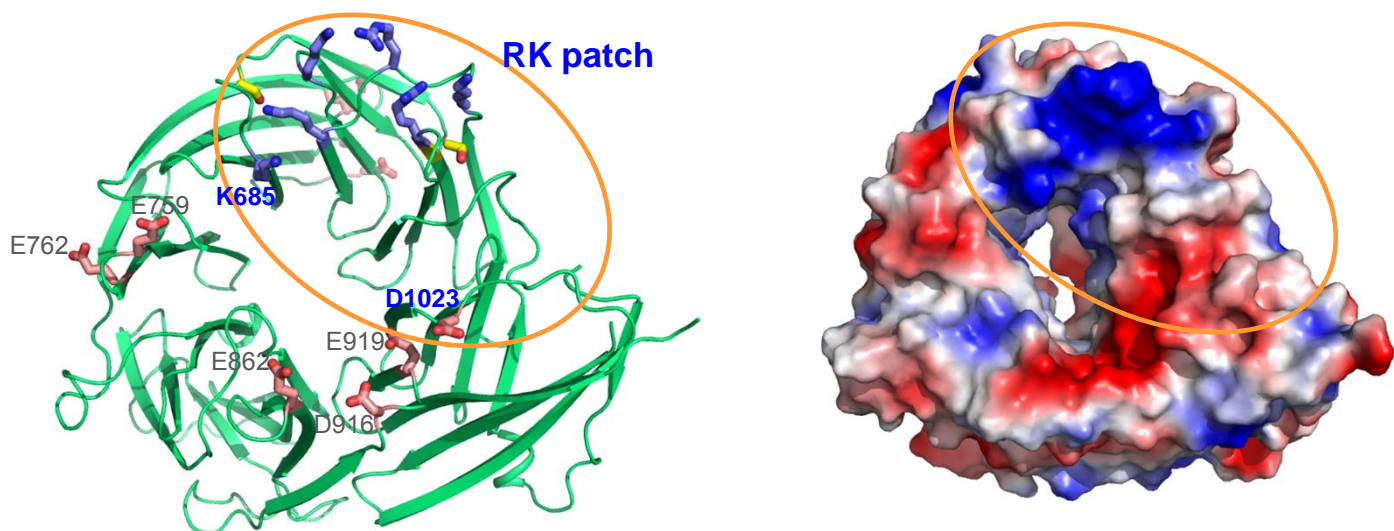

B

RK patch

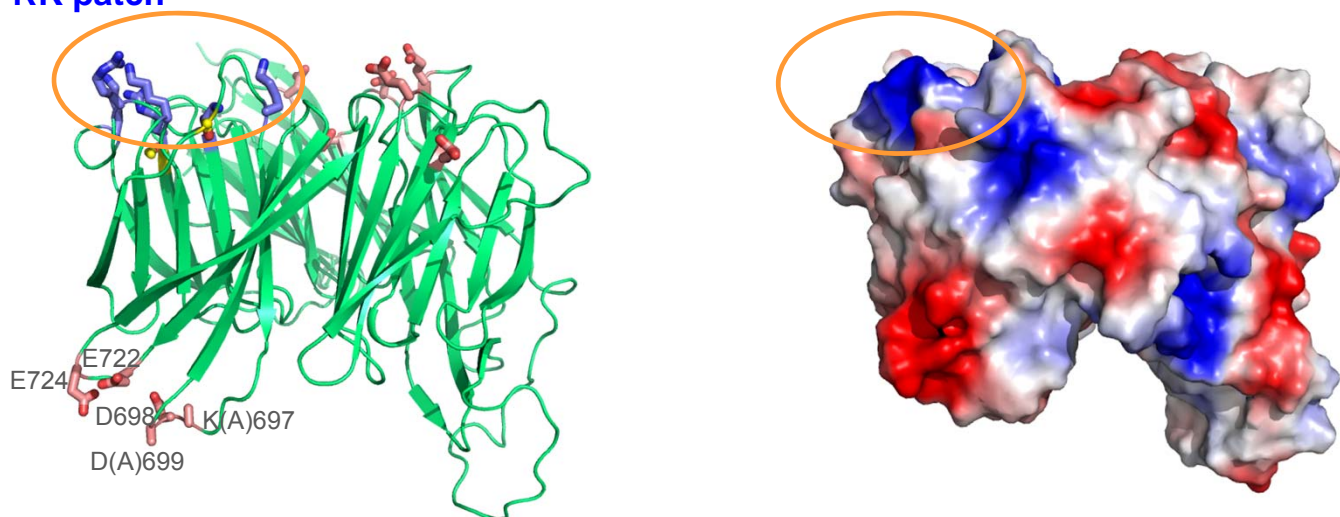

C

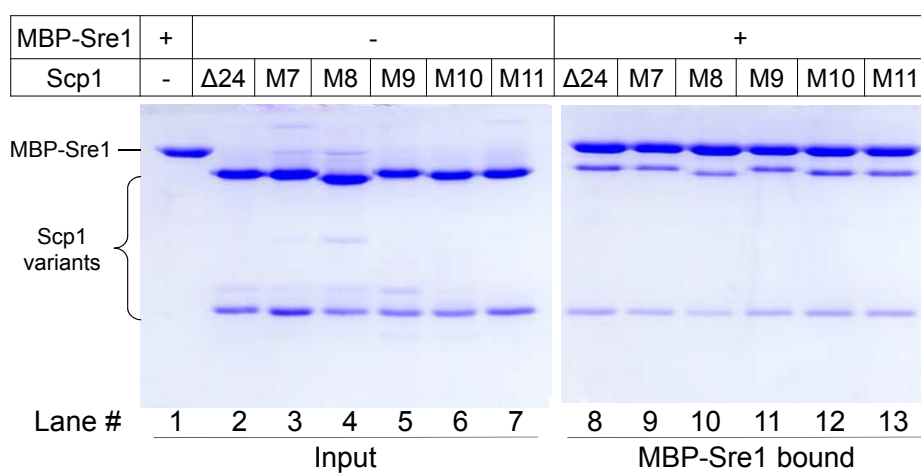

Scp1-Δ24: 567-961 &amp; 986-1085

Scp1-M8: 567-961 (D916K/E919K) &amp; 986-1085

Scp1-M10: 567-961 (D697K/D698K/E699K) &amp; 986-1085

Scp1-M7: 567-961 (E862K) &amp; 986-1085

Scp1-M9: 567-961 (E759K/E762K) &amp; 986-1085

Scp1-M11: 567-961 (E722K/E724K) &amp; 986-1085

Figure S5

**Supplementary information, Figure S5** The examined surface residues of

Scp1-WD40 that may not be involved in Sre1 binding.

**(A)** Two negatively charged surface regions on the top face of Scp1-WD40. Three Scp1 variants (M7: E862K; M8: D916K/E919K; M9: E759K/E762K) are tested for binding with Sre1. **(B)** One negatively charged surface patch on the bottom surface of Scp1-WD40. Two Scp1 variants (M10: D697K/D698K/E699K; M11: E722K/E724K) are tested for binding with Sre1. The electron density of Lys697 and Asp699 is not well resolved and Ala was assigned for these residues in the structural model. **(C)** Interaction between Scp1-WD40 variants (Scp1-M7, Scp1-M8, Scp1-M9, Scp1-M10, Scp1-M11) and Sre1 regulatory domain assessed by MBP-mediated pull down assay. The experiments were performed with the same protocol as that for Figure 4C.
