# Supplementary material for: Structure of the WD40 domain of SCAP from fission yeast reveals the molecular basis for SREBP recognition
Source: PubMed Central journal article supplement — Cell Res. 2015 Mar 13;25(4):401–11. doi: 10.1038/cr.2015.32 (PMC4387560; doi:10.1038/cr.2015.32), 2015-03-13
Supplement: cr201532x6.pdf [file cr201532x6.pdf]

**Supplementary information, Table S1** Crystallographic data collection and refinement statistics for Scp1-WD40

| Data                                      | Scp1-WD40 Native      | Scp1-WD40 Se-SAD     |
|-------------------------------------------|-----------------------|----------------------|
| Integration Package                       | HKL2000               | HKL2000              |
| Space Group                               | P2 <sub>1</sub>       | P2 <sub>1</sub>      |
| Unit Cell (Å)                             | 38.01, 109.71, 103.45 | 37.92,109.76,103.26  |
| Unit Cell (°)                             | 90.00, 100.46, 90.00  | 90.00, 100.39, 90.00 |
| Wavelength (Å)                            | 1.0000                | 0.9793               |
| Resolution (Å)                            | 40~2.05 (2.12~2.05)   | 50~2.62 (2.71~2.62)  |
| R <sub>merge</sub> (%)                    | 8.5 (39.1)            | 9.2 (39.9)           |
| I/sigma                                   | 20.0 (4.5)            | 34.2 (6.0)           |
| Completeness (%)                          | 99.0 (98.9)           | 98.9 (90.4)          |
| Number of measured reflections            | 192,570               | 186,374              |
| Number of unique reflections              | 51,784                | 25,071               |
| Redundancy                                | 3.7 (3.5)             | 7.4 (7.1)            |
| R <sub>work</sub> / R <sub>free</sub> (%) | 17.72/22.93           |                      |
| No. atoms                                 |                       |                      |
| Protein                                   | 6754                  |                      |
| main chain                                | 3403                  |                      |
| side chain                                | 3351                  |                      |
| Water                                     | 307                   |                      |
| Others                                    | 26                    |                      |
| Average B value (Å <sup>2</sup> )         |                       |                      |
| Protein                                   | 40.44                 |                      |
| main chain                                | 36.78                 |                      |
| side chain                                | 44.15                 |                      |
| Water                                     | 43.61                 |                      |
| Others                                    | 46.56                 |                      |
| R.m.s. deviations                         |                       |                      |
| Bonds (Å)                                 | 0.017                 |                      |
| Angle (°)                                 | 1.836                 |                      |
| Ramachandran plot statistics (%)          |                       |                      |
| Most favourable                           | 89.4                  |                      |
| Additionally allowed                      | 9.9                   |                      |
| Generously allowed                        | 0.7                   |                      |
| Disallowed                                | 0.0                   |                      |

Values in parentheses are for the highest resolution shell.  $R_{merge} = \frac{\sum_h \sum_i |I_{h,i} - I_h|}{\sum_h \sum_i I_{h,i}}$ , where  $I_h$  is the mean intensity of the  $i$  observations of symmetry related reflections of  $h$ .  $R = \frac{\sum |F_{obs} - F_{calc}|}{\sum F_{obs}}$ , where  $F_{calc}$  is the calculated protein structure factor from the atomic model (R<sub>free</sub> was calculated with 5% of the reflections selected).
