# Supplementary material for: Structure of the WD40 domain of SCAP from fission yeast reveals the molecular basis for SREBP recognition
Source: PubMed Central journal article supplement — Cell Res. 2015 Mar 13;25(4):401–11. doi: 10.1038/cr.2015.32 (PMC4387560; doi:10.1038/cr.2015.32), 2015-03-13
Supplement: cr201532x7.pdf [file cr201532x7.pdf]

**Supplementary information, Table S2** *S. pombe* strain list

| <i>S. pombe</i> Strains | Genotype                                                                                                                      | Reference or Source |
|-------------------------|-------------------------------------------------------------------------------------------------------------------------------|---------------------|
| KGY425                  | <i>h- leu1-32 ura4-D18 ade6-M210 his3-D1</i>                                                                                  | ATCC #96115         |
| KGY461                  | <i>h+ leu1-32 ura4-D18 ade6-M210 his3-D1</i>                                                                                  | ATCC #96116         |
| PEY554                  | <i>h- leu1-32 ura4-D18 ade6-M210 his3-D1</i><br>$\Delta$ <i>scp1-D1::kanMX6</i>                                               | Hughes et al., 2005 |
| PEY893                  | <i>h- leu1-32 ura4-D18 ade6-M210 his3-D1</i><br>$\Delta$ <i>hrd1-D1::kanMX6</i>                                               | Hughes et al., 2009 |
| PEY1748                 | <i>h- leu1-32 ura4-D18 ade6-M210 his3-D1</i><br>$\Delta$ <i>scp1-D1::natMX6</i>                                               | this study          |
| PEY1749                 | <i>h- leu1-32 ura4-D18 ade6-M210 his3-D1</i><br><i>scp1-13xMyc::kanMX6</i>                                                    | this study          |
| PEY1750                 | <i>h- leu1-32 ura4-D18 ade6-M210 his3-D1</i><br><i>scp1(R617E)-13xMyc::kanMX6</i>                                             | this study          |
| PEY1751                 | <i>h- leu1-32 ura4-D18 ade6-M210 his3-D1</i><br><i>scp1(K635E/R640E/K643E)-13xMyc::kanMX6</i>                                 | this study          |
| PEY1752                 | <i>h- leu1-32 ura4-D18 ade6-M210 his3-D1</i><br><i>scp1(K659E/K685E)-13xMyc::kanMX6</i>                                       | this study          |
| PEY1753                 | <i>h- leu1-32 ura4-D18 ade6-M210 his3-D1</i><br><i>scp1(C618S/C680S)-13xMyc::kanMX6</i>                                       | this study          |
| PEY1754                 | <i>h- leu1-32 ura4-D18 ade6-M210 his3-D1</i><br><i>scp1(D1023K)-13xMyc::kanMX6</i>                                            | this study          |
| PEY1755                 | <i>h- leu1-32 ura4-D18 ade6-M210 his3-D1</i><br><i>scp1(aa1-1054)-13xMyc::kanMX6</i>                                          | this study          |
| PEY1756                 | <i>h+ leu1-32 ura4-D18 ade6-M210 his3-D1</i><br>$\Delta$ <i>hrd1-D1::natMX6</i>                                               | this study          |
| PEY1757                 | <i>h- leu1-32 ura4-D18 ade6-M210 his3-D1</i><br><i>scp1-13xMyc::kanMX6</i> $\Delta$ <i>hrd1-D1::natMX6</i>                    | this study          |
| PEY1758                 | <i>h- leu1-32 ura4-D18 ade6-M210 his3-D1</i><br><i>scp1(R617E)-13xMyc::kanMX6</i> $\Delta$ <i>hrd1-D1::natMX6</i>             | this study          |
| PEY1759                 | <i>h- leu1-32 ura4-D18 ade6-M210 his3-D1</i><br><i>scp1(K635E/R640E/K643E)-13xMyc::kanMX6</i> $\Delta$ <i>hrd1-D1::natMX6</i> | this study          |
| PEY1760                 | <i>h- leu1-32 ura4-D18 ade6-M210 his3-D1</i><br><i>scp1(K659E/K685E)-13xMyc::kanMX6</i> $\Delta$ <i>hrd1-D1::natMX6</i>       | this study          |
